# Supplementary material for: Effect of static magnetic field on the performances of and anode biofilms in microbial fuel cells
Source: Royal Society of Chemistry journal article supplement (doi:10.1039/c6ra15844g), 2016-01-01
Supplement: c6ra15844g1.pdf [file c6ra15844g1.pdf]

**Supporting information for**  
**Effect of static magnetic field on the performance and anode**  
**biofilms in microbial fuel cells**

Y. N. Zhao,<sup>a,b,c</sup> X. F. Li,<sup>a,b,c</sup> \*✉ Y. P. Ren,<sup>a,b,c</sup> X. H. Wang,<sup>a,b,c</sup>

<sup>a</sup> *School of Environmental and Civil Engineering, Jiangnan University, Wuxi, Jiangsu  
214122, China.*

<sup>b</sup> *Jiangsu Key Laboratory of Anaerobic Biotechnology, Wuxi, Jiangsu 214122, China.*

<sup>c</sup> *Jiangsu Cooperative Innovation Center of Technology and Material of Water  
Treatment, Suzhou 215009, PR China.*

*\*Corresponding author: xfli@jiangnan.edu.cn. Tel: +86 510 85326516; fax: +86 510  
85326516.*

**Number of pages: 4**

**Number of figures: 2**

**Number of tables: 1**

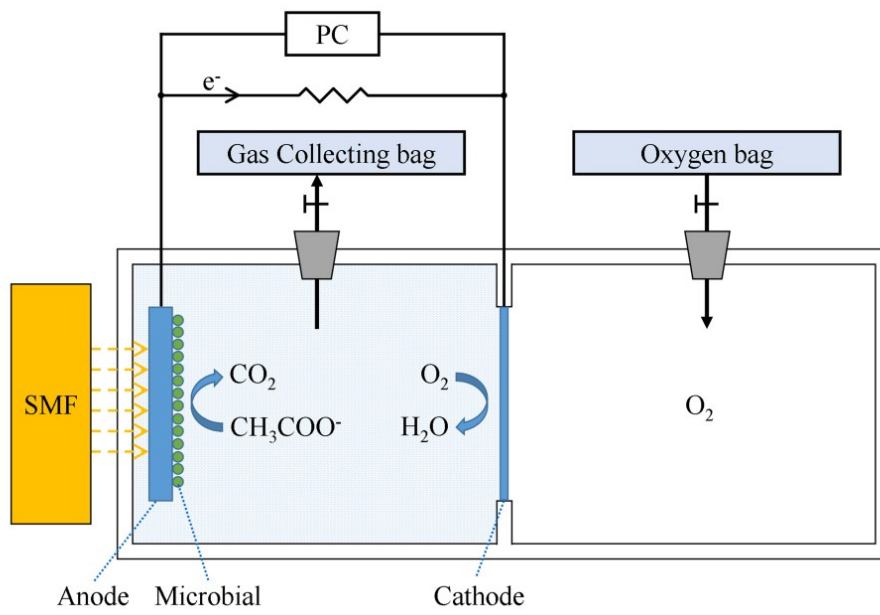

Fig.S1 The diagrammatic drawing of a closed MFC to test the gas volumes and composes.

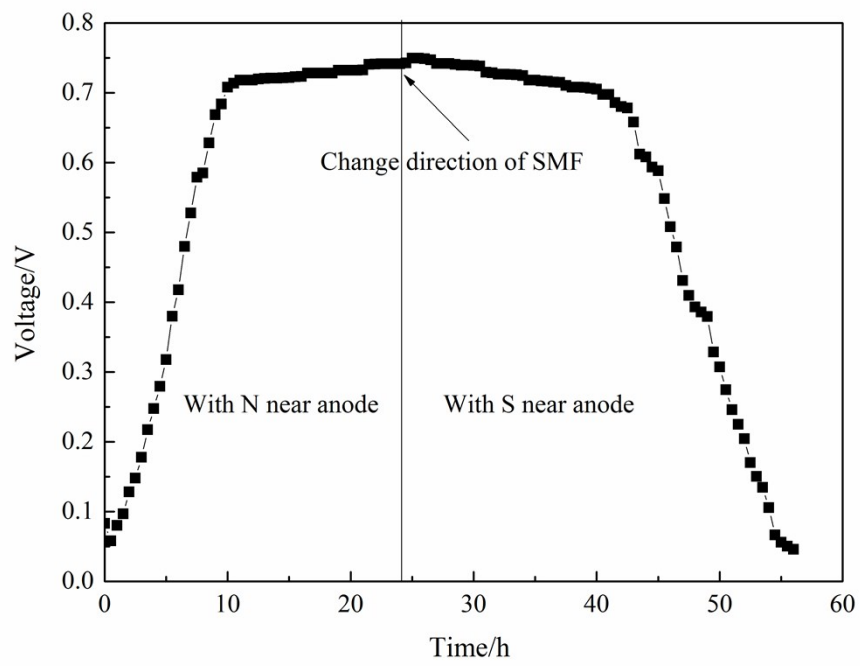

Fig.S2 Change direction of SMF in MFC-220 during the fifth stable cycle.

Table.S1 Gas volume and composition of air bag

|         | Gas volume of<br>set air bag | Gas composition/% |                 |                 |
|---------|------------------------------|-------------------|-----------------|-----------------|
|         |                              | H <sub>2</sub>    | CO <sub>2</sub> | CH <sub>4</sub> |
| control | 10.0±0.2                     | 4.99±0.08         | 69.39±0.62      | 22.88±0.26      |
| MFC-20  | 10.8±0.6                     | 4.71±0.11         | 71.49±0.14      | 19.92±0.22      |
| MFC-120 | 12.0±0.5                     | 5.55±0.31         | 82.62±0.76      | 10.99±0.01      |
| MFC-220 | 12.2±0.4                     | 5.33±0.05         | 83.00±0.91      | 8.10±0.52       |
| MFC-360 | 3.8±0.1                      | 4.90±0.19         | 83.61±0.20      | 10.84±0.11      |
